# Supplementary material for: Evaluating Prescription Pattern and Effectiveness of Antihypertensive Drugs in Non-Operated Aortic Dissection Patients
Source: MDPI journal article supplement (doi:10.3390/jcm12051962), 2023-03-01
Supplement: s1 [file s1]

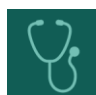

## SUPPLEMENTARY MATERIALS

**Table S1.** Individual components of the primary endpoint of non-operated AD patients.

|                                                            | N    | Events | PY   | Rate (%) <sup>a</sup> |
|------------------------------------------------------------|------|--------|------|-----------------------|
| <b>Composite outcome (primary outcome)</b>                 |      |        |      |                       |
| Class 0                                                    | 424  | 197    | 1531 | 12.86                 |
| Class 1                                                    | 676  | 325    | 2321 | 14.00                 |
| Class 2                                                    | 1035 | 434    | 3898 | 11.13                 |
| Class 3                                                    | 1100 | 397    | 4329 | 9.17                  |
| Class 4                                                    | 697  | 226    | 2809 | 8.05                  |
| <b>Rehospitalization associated with aortic dissection</b> |      |        |      |                       |
| Class 0                                                    | 424  | 13     | 1531 | 0.85                  |
| Class 1                                                    | 676  | 55     | 2321 | 2.37                  |
| Class 2                                                    | 1035 | 99     | 3910 | 2.53                  |
| Class 3                                                    | 1100 | 138    | 4332 | 3.19                  |
| Class 4                                                    | 697  | 116    | 2821 | 4.11                  |
| <b>Referred to aortic surgery</b>                          |      |        |      |                       |
| Class 0                                                    | 424  | 7      | 1553 | 0.45                  |
| Class 1                                                    | 676  | 39     | 2348 | 1.66                  |
| Class 2                                                    | 1035 | 65     | 3981 | 1.63                  |
| Class 3                                                    | 1100 | 99     | 4426 | 2.24                  |
| Class 4                                                    | 697  | 89     | 2879 | 3.09                  |
| <b>All-cause death</b>                                     |      |        |      |                       |
| Class 0                                                    | 424  | 189    | 1565 | 12.08                 |
| Class 1                                                    | 676  | 290    | 2452 | 11.83                 |
| Class 2                                                    | 1035 | 364    | 4152 | 8.77                  |
| Class 3                                                    | 1100 | 286    | 4692 | 6.10                  |
| Class 4                                                    | 697  | 129    | 3135 | 4.11                  |

<sup>a</sup> Rate was calculated as events divided by person-years, presented as %.
